# Supplementary material for: A Comparative Multi-Zoo Survey Investigating the Housing and Husbandry of Callimico goeldii
Source: MDPI journal article supplement (doi:10.3390/jzbg5010005), 2024-01-11
Supplement: s1 [file s1]

Archive with 2 entries (2 files):
- S1. UV Lighting reported in Housing and Husbandry Survey for Callimico 2021.pdf
- S2. Callimico goeldii Housing and Husbandry Survey 2021.pdf
