# Supplementary material for: A Comparative Multi-Zoo Survey Investigating the Housing and Husbandry of Callimico goeldii
Source: MDPI journal article supplement (doi:10.3390/jzbg5010005), 2024-01-11
Supplement: s1 [file s1]

# Callimico goeldii Housing and Husbandry Survey 2021

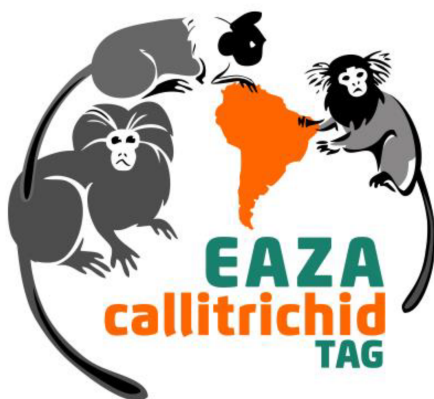

UNIVERSITY CENTRE  
SPARSHOLT

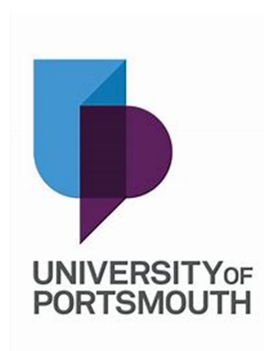

9<sup>th</sup> December 2020

**To: all EAZA Callimico holders**

Dear Callimico holder,

This is to confirm that the EAZA Callitrichid TAG supports this survey on *Callimico goeldii* housing and husbandry. The research is being carried out by Amanda Bartlett (Sparsholt University Centre).

The questionnaire should enable us to enhance best practice for the species in EAZA collections and therefore your cooperation in completing the survey would be appreciated.

Yours sincerely,

Eric Ruivo - Chair - Callitrichid TAG  
Miranda Stevenson – Vice-chair Callitrichid TAG  
Dominic Wormell – Vice-chair Callitrichid TAG

Thank you for taking time to complete this survey. There are 8 question sections of varying length which should be undertaken by staff with day to day knowledge of the Callimico goeldii enclosure. Some sections allow for more details to be added and the form can be completed by more than one member of staff, although it is important that only one completed form is submitted from each collection.

The aim of the survey is to create a picture of enclosures, furnishing and enrichment examples currently used in EAZA collections to enhance best practice for the species.

A copy of the survey results, together with the associated research, will be made available to EAZA Callimico holders.

Any queries regarding the survey, or requests for a paper copy of the questionnaire, can be directed to Amanda Bartlett at [20002596@stu.sparsholt.ac.uk](mailto:20002596@stu.sparsholt.ac.uk)

Please feel free to attach any photographs or plans of enclosures should you wish to do so at the end of the questionnaire.

Please note that all responses need to be returned by 31st January 2021

1. Name of Zoological Collection (Please note that no zoo names will be recorded within the research. Any emails attached to uploaded files, while received securely, will not form part of the research data).

---

What Callimico do you hold in your collection?

It is acknowledged that you may hold more than one group. Please either attach your taxon report or complete the information for each group below, as applicable. If you require further room for additional groups please add these at the end of the form

2. If you are submitting a taxon report you can do so here, if not please complete questions below as applicable

Files submitted:

### 3. Group 1 Males

Provide details of each male in the group together with their age, relationships and breeding status where applicable

---

---

---

---

---

### 4. Group 1 Females

Provide details of each female in the group together with their age, relationships and breeding status where applicable

---

---

---

---

---

### 5. Group 2 Males

Provide details of each male in the group together with their age, relationships and breeding status where applicable

---

---

---

---

---

## 6. Group 2 Females

Provide details of each females in the group together with their age, relationships and breeding status where applicable

---

---

---

---

---

## 7. Group 3 Males

Provide details of each male in the group together with their age, relationship and breeding status where applicable

---

---

---

---

---

## 8. Group 3 Females

Provide details of each female in the group together with their age, relationship and breeding status where applicable

---

---

---

---

---

*Skip to question 9*

## Enclosures

It is acknowledged that some collections have multiple enclosures for Callimico. Four duplicate sections are included, skip through to the next section as applicable. It would be helpful to establish enclosure construction; whether it is a separate internal or external enclosure and whether the animals are on exhibit in this enclosure. A group may use more than one enclosure. If more sections are required please add the information at the end of the survey.

9. Which group (from previous section) occupies enclosure 1?

---

10. Enclosure 1 - Type of exhibit (tick all that apply)

*Tick all that apply.*

☐ On exhibit

☐ Off exhibit

☐ Internal

☐ External

11. Is this a mixed species exhibit? If yes please provide details of what species they are housed with, and how many of the other species they are held with.

---

---

---

---

---

12. Enclosure 1 - Is there free access between this enclosure and another? Please specify which one . If applicable please advise an approximate amount of time that enclosure 1 is used daily.

---

13. What are the dimensions of enclosure 1? Height/Width/Depth (m)

---

14. Please briefly describe the enclosure 1 construction (timber, glass, wire mesh etc)

---

---

---

---

---

15. What is the average temperature in enclosure 1?

---

16. Which group (from previous section) occupies enclosure 2?

---

17. Enclosure 2 - Type of exhibit (tick all that apply)

*Tick all that apply.*

- ☐ On exhibit  
☐ Off exhibit  
☐ Internal  
☐ External

18. Is this a mixed species exhibit? If yes please provide details of what species they are housed with, and how many of the other species they are held with.

---

---

---

---

---

19. Enclosure 2 - Is there free access between this enclosure and another? Please specify which one . If applicable please advise an approximate amount of time that enclosure 2 is used daily.

---

20. What are the dimensions of enclosure 2? Height/Width/Depth (m)

---

21. Please briefly describe the enclosure 2 construction (timber, glass, wire mesh etc)

---

---

---

---

---

22. What is the average temperature in enclosure 2?

---

23. Which group occupies this enclosure 3?

---

24. Enclosure 3 - Type of exhibit (tick all that apply)

*Tick all that apply.*

- ☐ On exhibit  
☐ Off exhibit  
☐ Internal  
☐ External

25. Is this a mixed species exhibit? If yes please provide details of what species they are housed with, and how many of the other species they are held with.

---

---

---

---

---

26. Enclosure 3 - Is there free access between this enclosure and another? Please specify which one . If applicable please advise an approximate amount of time that enclosure 2 is used daily.

---

27. What are the dimensions of enclosure 3? Height/Width/Depth (m)

---

28. Please briefly describe the enclosure 3 construction (timber, glass, wire mesh etc)

---

---

---

---

---

29. What is the average temperature in enclosure 3?

---

30. Which group occupies enclosure 4?

---



## 31. Enclosure 4 - Type of exhibit (tick all that apply)

*Tick all that apply.*

- ☐ On exhibit  
☐ Off exhibit  
☐ Internal  
☐ External

## 32. Is this a mixed species exhibit? If yes please provide details of what species they are housed with, and how many of the other species they are held with.

---

---

---

---

---

## 33. Enclosure 4 - Is there free access between this enclosure and another? Please specify which one . If applicable please advise an approximate amount of time that enclosure 2 is used daily.

---

## 34. What are the dimensions of enclosure 4? Height/Width/Depth (m)

---

## 35. Please briefly describe the enclosure 4 construction (timber, glass, wire mesh etc)

---

---

---

---

---

36. What is the average temperature in enclosure 4?

---

#### UV lighting

37. Are internal enclosures fitted with UV lighting

*Tick all that apply.*

☐ Yes

☐ No

38. If yes please advise if used with a timed cycle, and applicable hours

---

39. Please advise make/brand of bulb used if known

---

#### Humidity

40. Is the humidity of the enclosures monitored?

*Tick all that apply.*

☐ Yes

☐ No

41. If yes what is the normal humidity range, if applicable?

---

## 42. How is humidity maintained?

(tick all that apply)

*Tick all that apply.*

- ☐ Misting
- ☐ Reservoirs (buckets/pans)
- ☐ dampening substrate
- ☐ other

## Substrate

Please provide information on substrates used

## 43. Substrate - on exhibit

(tick all that apply)

*Tick all that apply.*

- ☐ wood bark
- ☐ wood shavings
- ☐ wood wool
- ☐ soil
- ☐ grass
- ☐ 'bio-floor'
- ☐ Other: \_\_\_\_\_

## 44. Substrate - off exhibit

(tick all that apply)

*Tick all that apply.*

- ☐ wood bark
- ☐ wood shavings
- ☐ wood wool
- ☐ soil
- ☐ grass
- ☐ 'bio floor'
- ☐ Option 7
- ☐ Other: \_\_\_\_\_

## Planting

### 45. Where is planting used in the exhibits?

Please tick all that apply

*Tick all that apply.*

☐ on exhibit

☐ off exhibit

### 46. Please provide as much information as you are able about any plants used including if natural or otherwise, in pots or permanent planting and species if known

---

---

---

---

---

## Furnishings

What furnishings are used in the enclosure? Please tick all that apply .

### 47. On Exhibit (tick all that apply)

*Tick all that apply.*

☐ shelving

☐ ropes

☐ hoses

☐ natural branches

☐ hammocks

☐ nest boxes

☐ netting or other means of visual camouflage

☐ Other: \_\_\_\_\_

48. On exhibit furnishing - please provide any specific details that you are able to, approximate branch and rope diameters are particularly useful. How many of each item is also of interest

---

---

---

---

---

49. Off Exhibit (tick all that apply)

*Tick all that apply.*

- ☐ shelving  
☐ ropes  
☐ hoses  
☐ natural branches  
☐ hammocks  
☐ nest boxes  
☐ netting or other means of visual camouflage  
☐ Other: \_\_\_\_\_

50. Off exhibit furnishing - please provide any specific details that you are able to, approximate branch and rope diameters are particularly useful. How many of each item is also of interest

---

---

---

---

---

## Enrichment

What types of enrichment are used, and how often?

51. Please provide details of the type and frequency of use any enrichment that you use, including placement within the enclosure.

---

---

---

---

---

52. What food groups do you use for food/foraging enrichment?

*Tick all that apply.*

- ☐ Invertebrates  
☐ Vegetables  
☐ Fruit  
☐ Gum

53. What training do you use with Callimico?

---

---

---

---

---

54. Pictures of enrichment can be uploaded here if you wish to share them

Files submitted:

Thank you

Your participation in this survey is appreciated. If you wish to add any further information about the Callimico enclosures or upload details this can be done below.

55. Files submitted:

56. Please use this space to add any further information either to continue from an earlier section or if there is anything additional you would like to add.

---

---

---

---

---

---

This content is neither created nor endorsed by Google.

Google Forms
