# Supplementary material for: A Comparative Multi-Zoo Survey Investigating the Housing and Husbandry of Callimico goeldii
Source: MDPI journal article supplement (doi:10.3390/jzbg5010005), 2024-01-11
Supplement: s1 [file s1]

UV Lighting reported in Housing and Husbandry Survey for Callimico 2021

| UV Lighting                                                                               | Cycle                   |
|-------------------------------------------------------------------------------------------|-------------------------|
| 4 X D3 Arcadia T5 24W                                                                     | Seasonal daylight       |
| Arcadia T5 3 foot lamps x2                                                                | Timed cycle unspecified |
| Arcadia prot 5 kit 6%                                                                     | 10 hours                |
| Arcadia D3 UV basking lamp & Econlux solar raptor UV Mercury Vapor lamp                   | 12 hours                |
| Arcadia T5s                                                                               | 12 hour cycles          |
| Arcadia D3 basking lamp 160W                                                              | 4 hours                 |
| Arcadia d3+ reptile 12%uvb lamp 1.15m x 4 lamps in 2 locations                            | 8-7                     |
| Dragon-drango lux Easy UV                                                                 | 12 hours                |
| Philips 200 W                                                                             | 4 x 30 mins             |
| Philips ultravit 300W                                                                     | 12 hours                |
| Ultra Vitalux 230v 300w phillips                                                          | 3 x30 mins              |
| Ultra Vitalux                                                                             | Once a day 30 minutes   |
| Power sun                                                                                 | 2 hours a day           |
| Sunglo 150 W                                                                              | 3 x15 minutes           |
| Heating bulb with UV light and fluorescent lamps with uv spectrum from narva and repistar | 6 am - 6pm,             |

|                                                |                            |
|------------------------------------------------|----------------------------|
| 160w reptile system                            | 30mins X 3 a day           |
| 100w bulb Infrared bulb, 250w season dependent | 13-16 hours a day          |
| 160w UV spot bulb                              | 6-7 hours                  |
| Reptile UVB 200 (25W)                          | 12 hour                    |
| LED x UVA (no UVB)                             | 10 hours                   |
| Unspecified source                             | 8-10 hours a day,          |
| Unspecified source                             | 12 hours 6 to 6            |
| Unspecified source                             | In winter and for newborns |
| Unspecified source                             | 4 hours                    |
